# Supplementary material
Source: HighWire-hosted journal article supplement (https://jnis.bmj.com/highwire/filestream/165743/field_highwire_adjunct_files/0/neurintsurg-2020-016930supp001_data_supplement.pdf)
Supplement: neurintsurg-2020-016930supp001_data_supplement.pdf [file neurintsurg-2020-016930supp001_data_supplement.pdf]

SUPPLEMENTAL MATERIALS

## 1.0 Supplemental Tables

**Supplemental Table I. Sources used to obtain costs for analyses**

| Study/<br>Source                | Country | Currency                 | Components included in costs                                                                                                                                                           | Cost (reported year<br>currency)        | Cost (2020 currency)                                   |
|---------------------------------|---------|--------------------------|----------------------------------------------------------------------------------------------------------------------------------------------------------------------------------------|-----------------------------------------|--------------------------------------------------------|
| LOS cost per day                |         |                          |                                                                                                                                                                                        |                                         |                                                        |
| Gershengorn<br>(2015)[1]        | US      | 2013 USD                 | Daily costs for quaternary surgical<br>ICU                                                                                                                                             | \$1766.67                               | \$2,138.79                                             |
| Chen (2019)[2]                  |         | 2018 USD                 | Average cost for ward cost per day<br>across bariatric, colectomy, hepatic<br>resection, lobectomy, and<br>hysterectomy procedures in<br>Americas                                      | \$966.22                                | \$1,025.97                                             |
| ENC MCO<br>(2016)               | France  | 2016 Euros               | Medical professionals, pharmacy,<br>and overhead (e.g. cleaning,<br>laundry)                                                                                                           | €226.28                                 | €226.39                                                |
| Dodel<br>(2004)[3]              | Germany | 2002 Euros               | Diagnostic procedures, medical<br>treatment, drugs, physiotherapy,<br>speech therapy, nursing, and<br>nonmedical supplies                                                              | €360.00                                 | €507.48                                                |
| Fattore<br>(2012)[4]            | Italy   | 2007 Euros               | Resources used during the index<br>hospitalization (e.g. drugs, imaging<br>and laboratory exams, consumables,<br>medical procedures, consultation<br>visits, inpatient rehabilitation) | €412.81                                 | €512.07                                                |
| Vega-Valdes<br>(2018)[5]        | Spain   | 2016 Euros               | Diagnostic procedures and medical<br>treatment                                                                                                                                         | €1,051.54                               | €1,072.48                                              |
| Carlsson<br>(2017)[6]           | Sweden  | 2015<br>Swedish<br>Krona | Resources used in a neurological<br>ICU and the neurological<br>department                                                                                                             | ICU: SEK 16,223.42<br>SBD: SEK 4,836.08 | ICU: SEK 16,929.79<br>SBD: SEK 5,046.64                |
| Ming Xu<br>(2018)[7]            | UK      | 2015<br>Pounds           | Resources used in an acute stroke<br>unit and a general medical ward                                                                                                                   | ICU: £649.00<br>SBD: £210.00            | ICU: £728.18<br>SBD: £235.62                           |
| Device cost                     |         |                          |                                                                                                                                                                                        |                                         |                                                        |
| Internal market<br>research for | US      | -                        | Stent retrievers and aspiration<br>devices                                                                                                                                             | -                                       | Stent retriever: \$7,852<br>Aspiration device: \$5,415 |

| Study/Source                                                | Country | Currency   | Components included in costs                                                                                                                              | Cost (reported year currency)                                                                                                    | Cost (2020 currency)                                                                                                             |
|-------------------------------------------------------------|---------|------------|-----------------------------------------------------------------------------------------------------------------------------------------------------------|----------------------------------------------------------------------------------------------------------------------------------|----------------------------------------------------------------------------------------------------------------------------------|
| stent retrievers and Vidal (2016)[8] for aspiration devices |         |            |                                                                                                                                                           |                                                                                                                                  |                                                                                                                                  |
| Internal market report[9]                                   | France  | -          |                                                                                                                                                           | -                                                                                                                                | Stent retriever: €2,300.00<br>Aspiration device: €932.00                                                                         |
|                                                             | Germany | -          |                                                                                                                                                           | -                                                                                                                                | Stent retriever: €1,400.00<br>Aspiration device: €673.00                                                                         |
|                                                             | Italy   | -          |                                                                                                                                                           | -                                                                                                                                | Stent retriever: €3,420.00<br>Aspiration device: €946.00                                                                         |
|                                                             | Spain   | -          |                                                                                                                                                           | -                                                                                                                                | Stent retriever: €2,680.00<br>Aspiration device: €963.00                                                                         |
|                                                             | Sweden  | -          |                                                                                                                                                           | -                                                                                                                                | Stent retriever: SEK 26,136.04<br>Aspiration device: SEK 10,685.30                                                               |
|                                                             | UK      | -          |                                                                                                                                                           | -                                                                                                                                | Stent retriever: £2,390.00<br>Aspiration device: £517.00                                                                         |
| Cost per mRS score(s)                                       |         |            |                                                                                                                                                           |                                                                                                                                  |                                                                                                                                  |
| Shireman (2017)[10]                                         | US      | 2015 USD   | Inpatient and outpatient costs including nursing home costs using data from the National Death Index and Centers for Medicare and Medicaid Services (CMS) | mRS 0: \$10,569.00<br>mRS 1: \$10,883.00<br>mRS 2: \$12,590.00<br>mRS 3: \$21,618.00<br>mRS 4: \$43,755.00<br>mRS 5: \$64,327.00 | mRS 0: \$12,176.06<br>mRS 1: \$12,537.81<br>mRS 2: \$14,504.36<br>mRS 3: \$24,905.11<br>mRS 4: \$50,408.13<br>mRS 5: \$74,108.19 |
| Spieler (2004)[11]                                          | France  | 1997 Euros | Ambulatory care, orthosis, drugs, convalescent home, rehabilitation, new acute hospitalization, nursing home, and long-term chronic hospitalization       | mRS 0-2: €10,000.00<br>mRS 3: €17,355.37<br>mRS 4-5: €31,322.31                                                                  | mRS 0-2: €12,816.51<br>mRS 3: €22,243.53<br>mRS 4-5: €40,144.27                                                                  |
| Fattore (2012)[4]                                           | Italy   | 2007 Euros | Resources used from discharge to 12 months (e.g. hospital admissions, clinical consultations, diagnostic procedures, domiciliary care,                    | mRS 0-2: €1,964.80*<br>mRS 3: €5,239.10*<br>mRS 4-5: €13,381.50*                                                                 | mRS 0: €2,071.65<br>mRS 1: €2,437.23<br>mRS 2: €2,802.82<br>mRS 3: €5,524.01                                                     |

| Study/<br>Source                                             | Country | Currency       | Components included in costs                                                                                                                | Cost (reported year<br>currency)                                                                                                                 | Cost (2020 currency)                                                                                                                             |
|--------------------------------------------------------------|---------|----------------|---------------------------------------------------------------------------------------------------------------------------------------------|--------------------------------------------------------------------------------------------------------------------------------------------------|--------------------------------------------------------------------------------------------------------------------------------------------------|
|                                                              |         |                | medical therapies, rehabilitation services, number of general practitioner visits, days of work lost, number of hours of informal care)     |                                                                                                                                                  | mRS 4: €7,473.66<br>mRS 5: €16,599.06                                                                                                            |
| Dental and<br>Pharmaceutical<br>Benefits Agency<br>(TLV)[12] | Sweden  |                | Resources used for annual post acute care (healthcare professional time, emergency care, outpatient visits, day cases and hospitalisations) | mRS 0: SEK 71,600.00<br>mRS 1: SEK 94,000.00<br>mRS 2: SEK 147,200.00<br>mRS 3: SEK 178,700.00<br>mRS 4: SEK 233,900.00<br>mRS 5: SEK 284,700.00 | mRS 0: SEK 74,717.49<br>mRS 1: SEK 98,092.80<br>mRS 2: SEK 153,609.15<br>mRS 3: SEK 186,480.67<br>mRS 4: SEK 244,084.10<br>mRS 5: SEK 297,095.95 |
| Lobotesis<br>(2016)[13]                                      | UK      | 2014<br>Pounds | Long-term accommodation in warden housing and nursing or residential care                                                                   | mRS 0: £2,846.00<br>mRS 1: £3,348.00<br>mRS 2: £3,850.00<br>mRS 3: £13,697.00<br>mRS 4: £18,532.00<br>mRS 5: £30,093.00                          | mRS 0: £3,255.06<br>mRS 1: £3,829.21<br>mRS 2: £4,403.36<br>mRS 3: £15,665.68<br>mRS 4: £21,195.62<br>mRS 5: £34,418.29                          |

\* Although Fattore (2012) reported costs for aggregate mRS scores (i.e. mRS 0-2, mRS 3, mRS 4-5), they were converted to costs per individual mRS score (i.e. mRS 0 to 6) based on an Italian cost-effectiveness analysis.<sup>14</sup>

Abbreviations: ENC = L'Etude nationale des coûts; ICU = intensive care unit; LOS = length of stay; MCO = médecine, chirurgie, obstétrique et odontologie; mRS = modified Rankin Scale; NR = not reported; SBD = standard bed day; SEK = Swedish Krona; UK = United Kingdom; US = United States; USD = United States Dollars.

**Supplemental Table II. Clinical and healthcare resource use outcomes for the FPE (mTICI 3) and non-FPE (mTICI 3) groups**

| Outcome                                                                           | FPE (mTICI 3)<br>(n=67) | Non-FPE (mTICI 3)<br>(n=51) | P-Value* |
|-----------------------------------------------------------------------------------|-------------------------|-----------------------------|----------|
| <b>Clinical outcomes</b>                                                          |                         |                             |          |
| 90-day mRS (categorized into good and excellent functional outcomes) <sup>†</sup> |                         |                             |          |
| 90-day mRS, good outcomes (mRS 0-2), n (%)                                        | 50 (78.13%)             | 30 (62.50%)                 | 0.07     |
| 90-day mRS, excellent outcomes (mRS 0-1), n (%)                                   | 40 (62.50%)             | 26 (54.17%)                 | 0.38     |
| 90-day mortality <sup>‡</sup>                                                     |                         |                             |          |
| 90-day mortality, n (%)                                                           | 5 (7.69%)               | 7 (13.73%)                  | 0.29     |
| sICH within 24-hours                                                              |                         |                             |          |
| sICH within 24-hours, n (%)                                                       | 2 (2.99%)               | 1 (1.96%)                   | 1.00     |
| ENT                                                                               |                         |                             |          |
| ENT, n (%)                                                                        | 1 (1.49%)               | 6 (11.76%)                  | 0.04     |
| <b>Healthcare resource use outcomes</b>                                           |                         |                             |          |
| <b>LOS</b>                                                                        |                         |                             |          |
| Total LOS, mean (IQR) <sup>§</sup>                                                | 6.22 (3.00 – 8.00)      | 9.56 (3.00 – 11.75)         | 0.03     |
| Standard bed days, mean (IQR) <sup>  </sup>                                       | 3.08 (0.00 – 5.00)      | 6.46 (1.00 – 9.25)          | 0.03     |
| ICU days, mean (IQR) <sup>#</sup>                                                 | 3.56 (2.00 – 4.00)      | 3.38 (2.00 – 4.00)          | 0.77     |
| <b>Additional devices used during procedure</b>                                   |                         |                             |          |
| Stent retrievers, %                                                               | 0%                      | 37.25%                      | NA       |
| Aspiration devices, %                                                             | 0%                      | 1.96%                       | NA       |

\* P-values presented for the following tests: t-test and Wilcoxon rank-sum (Mann-Whitney) test for continuous variables and chi-square or Fisher's exact test for categorical variables.

<sup>†</sup> Six patients missing data for 90-day mRS.

<sup>‡</sup> Two patients missing data for 90-day mortality.

<sup>§</sup> Represents the date of discharge minus date of admission to study hospital; five patients missing data for LOS.

<sup>||</sup> Represents the normal ward days; seven patients missing data for standard bed days.

<sup>#</sup> Five patients missing data for ICU days.

Abbreviations: ENT = embolization into new territory; FPE = first pass effect; ICU = intensive care unit; IQR = interquartile range; LOS = length of stay; mRS = modified Rankin Scale; NA = not applicable; sICH = symptomatic intracerebral hemorrhage.

**Supplemental Table III. Cost differences from sensitivity analyses comparing average per-patient procedural and hospitalization-related and annual care costs for the FPE and non-FPE groups**

|                                                                    | US     | France |        | Germany         |                 | Italy  |        | Spain           |                 | Sweden  |        | UK     |        |
|--------------------------------------------------------------------|--------|--------|--------|-----------------|-----------------|--------|--------|-----------------|-----------------|---------|--------|--------|--------|
| Currency (2020)                                                    | USD    | €      | USD*   | €               | USD*            | €      | USD*   | €               | USD*            | SEK     | USD*   | £      | USD*   |
| Base-case (cost differences)                                       |        |        |        |                 |                 |        |        |                 |                 |         |        |        |        |
| Procedural and hospitalization-related                             | -6,575 | -1,560 | -1,833 | -2,202          | -2,587          | -2,901 | -3,409 | -4,548          | -5,343          | -29,468 | -3,364 | -1,751 | -2,285 |
| Annual care                                                        | -4,116 | -2,131 | -2,503 | NA <sup>†</sup> | NA <sup>†</sup> | -701   | -823   | NA <sup>†</sup> | NA <sup>†</sup> | -13,333 | -1,522 | -2,132 | -2,783 |
| Sensitivity analyses (cost differences)                            |        |        |        |                 |                 |        |        |                 |                 |         |        |        |        |
| Alternative definitions of FPE                                     |        |        |        |                 |                 |        |        |                 |                 |         |        |        |        |
| FPE (mTICI 3)                                                      |        |        |        |                 |                 |        |        |                 |                 |         |        |        |        |
| Procedural and hospitalization-related                             | -6,429 | -1,631 | -1,916 | -2,230          | -2,620          | -3,003 | -3,528 | -4,599          | -5,404          | -26,195 | -2,990 | -1,662 | -2,169 |
| Annual care                                                        | -4,338 | -2,115 | -2,485 | NA <sup>†</sup> | NA <sup>†</sup> | -809   | -950   | NA <sup>†</sup> | NA <sup>†</sup> | -10,683 | -1,219 | -2,133 | -2,783 |
| FPE (mTICI 2b-3)                                                   |        |        |        |                 |                 |        |        |                 |                 |         |        |        |        |
| Procedural and hospitalization-related                             | -4,689 | -1,261 | -1,482 | -1,871          | -2,198          | -2,393 | -2,811 | -3,878          | -4,556          | -17,206 | -1,964 | -1,119 | -1,461 |
| Annual care                                                        | -6,010 | -3,141 | -3,690 | NA <sup>†</sup> | NA <sup>†</sup> | -1,087 | -1,278 | NA <sup>†</sup> | NA <sup>†</sup> | -18,941 | -2,162 | -3,142 | -4,101 |
| Variations in LOS around the first and third quartile <sup>‡</sup> |        |        |        |                 |                 |        |        |                 |                 |         |        |        |        |
| LOS (first quartile)                                               |        |        |        |                 |                 |        |        |                 |                 |         |        |        |        |
| Procedural and hospitalization-related                             | -2,265 | -795   | -934   | -486            | -572            | -1,170 | -1,375 | -923            | -1,084          | -3,411  | -389   | -581   | -759   |
| LOS (third quartile)                                               |        |        |        |                 |                 |        |        |                 |                 |         |        |        |        |
| Procedural and hospitalization-related                             | -5,696 | -1,474 | -1,732 | -2,009          | -2,360          | -2,707 | -3,180 | -4,140          | -4,864          | -22,323 | -2,548 | -1,445 | -1,885 |
| Variations in costs                                                |        |        |        |                 |                 |        |        |                 |                 |         |        |        |        |
| Increased by 20%                                                   |        |        |        |                 |                 |        |        |                 |                 |         |        |        |        |
| Procedural and hospitalization-related                             | -7,890 | -1,872 | -2,199 | -2,642          | -3,104          | -3,482 | -4,090 | -5,457          | -6,412          | -35,362 | -4,036 | -2,101 | -2,742 |
| Annual care                                                        | -4,939 | -2,557 | -3,004 | NA <sup>†</sup> | NA <sup>†</sup> | -841   | -988   | NA <sup>†</sup> | NA <sup>†</sup> | -15,999 | -1,826 | -2,559 | -3,339 |
| Decreased by 20%                                                   |        |        |        |                 |                 |        |        |                 |                 |         |        |        |        |

|                                        | US     | France |        | Germany         |                 | Italy  |        | Spain           |                 | Sweden  |        | UK     |        |
|----------------------------------------|--------|--------|--------|-----------------|-----------------|--------|--------|-----------------|-----------------|---------|--------|--------|--------|
| Currency (2020)                        | USD    | €      | USD*   | €               | USD*            | €      | USD*   | €               | USD*            | SEK     | USD*   | £      | USD*   |
| Procedural and hospitalization-related | -5,260 | -1,248 | -1,466 | -1,761          | -2,069          | -2,321 | -2,727 | -3,638          | -4,275          | -23,575 | -2,691 | -1,401 | -1,828 |
| Annual care                            | -3,293 | -1,705 | -2,003 | NA <sup>†</sup> | NA <sup>†</sup> | -561   | -659   | NA <sup>†</sup> | NA <sup>†</sup> | -10,666 | -1,218 | -1,706 | -2,226 |

Negative values indicate cost savings for the FPE group as compared with the non-FPE group.

\* Exchange rates reported for August 03, 2020, 16:00 UTC were used. The exchange rates were as follows: 1.00 EUR: 1.17 USD, 1.00 SEK: 0.11 USD and 1.00 GBP: 1.31 USD.

<sup>†</sup> Annual care costs, based on 90-day mRS, were not found for Germany and Spain.

<sup>‡</sup> LOS was varied within its IQR since this parameter was not normally distributed. Additionally, variations in LOS did not impact annual care costs.

Abbreviations: FPE = first pass effect; GBP = Great British Pound; IQR = interquartile range; LOS = length of stay; mTICI = modified Thrombolysis in Cerebral Infarction; NA = not applicable; SEK = Swedish Krona; UK = United Kingdom; US = United States; USD = United States Dollar; UTC = Coordinated Universal Time.

**Supplemental Table IV. Clinical outcomes for the FPE (mTICI 2b-3) and non-FPE (mTICI 2b-3) groups**

| Outcome                                                                                 | FPE (mTICI 2b-3)<br>(n=117) | Non-FPE (mTICI 2b-3)<br>(n=93) | P-Value* |
|-----------------------------------------------------------------------------------------|-----------------------------|--------------------------------|----------|
| <b>Clinical outcomes</b>                                                                |                             |                                |          |
| <b>90-day mRS (categorized into good and excellent functional outcomes)<sup>†</sup></b> |                             |                                |          |
| 90-day mRS, good outcomes (mRS 0-2), n (%)                                              | 89 (79.46%)                 | 48 (54.55%)                    | <0.01    |
| 90-day mRS, excellent outcomes (mRS 0-1), n (%)                                         | 70 (62.50%)                 | 37 (42.05%)                    | <0.01    |
| <b>90-day mortality<sup>‡</sup></b>                                                     |                             |                                |          |
| 90-day mortality, n (%)                                                                 | 5 (4.42%)                   | 12 (13.04%)                    | 0.03     |
| <b>sICH within 24-hours</b>                                                             |                             |                                |          |
| sICH within 24-hours, n (%)                                                             | 2 (1.71%)                   | 7 (7.53%)                      | 0.08     |
| <b>ENT</b>                                                                              |                             |                                |          |
| ENT, n (%)                                                                              | 4 (3.42%)                   | 10 (10.75%)                    | 0.03     |
| <b>Healthcare resource use outcomes</b>                                                 |                             |                                |          |
| <b>LOS</b>                                                                              |                             |                                |          |
| Total LOS, mean (IQR) <sup>§</sup>                                                      | 6.38 (3.00 – 8.00)          | 9.36 (3.00 – 11.00)            | <0.01    |
| Standard bed days, mean (IQR) <sup>  </sup>                                             | 3.16 (0.00 – 5.00)          | 7.22 (1.00 – 9.00)             | <0.01    |
| ICU days, mean (IQR) <sup>#</sup>                                                       | 3.51 (2.00 – 4.00)          | 3.37 (1.50 – 4.00)             | 0.77     |
| <b>Additional devices used during procedure</b>                                         |                             |                                |          |
| Stent retrievers, %                                                                     | 5.13%                       | 30.11%                         | NA       |
| Aspiration devices, %                                                                   | 0.85%                       | 2.16%                          | NA       |

\* P-values presented for the following tests: t-test and Wilcoxon rank-sum (Mann-Whitney) test for continuous variables and chi-square or Fisher's exact test for categorical variables.

<sup>†</sup> Ten patients missing data for 90-day mRS.

<sup>‡</sup> Five patients missing data for 90-day mortality.

<sup>§</sup> Represents the date of discharge minus date of admission to study hospital; nine patients missing data for LOS.

<sup>||</sup> Represents the normal ward days; ten patients missing data for standard bed days.

<sup>#</sup> Eight patients missing data for ICU days.

Abbreviations: ENT = embolization into new territory; FPE = first pass effect; ICU = intensive care unit; IQR = interquartile range; LOS = length of stay; mRS = modified Rankin Scale; NA = not applicable; sICH = symptomatic intracerebral hemorrhage.



## 2.0 Supplemental Figures

### Supplemental Figure I. Patient flowchart displaying the number of patients who did or did not achieve FPE in ARISE II

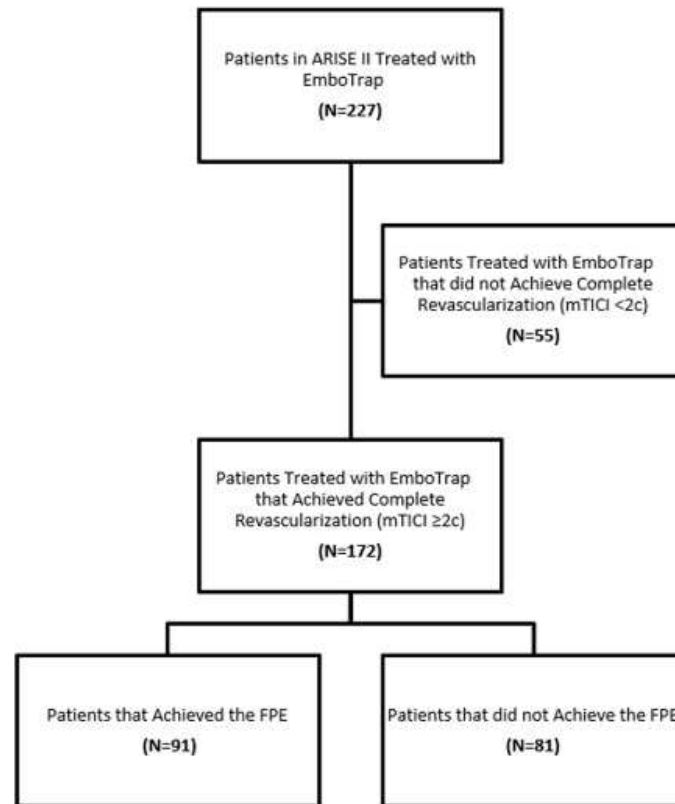

**Supplemental Figure II. Proportion of patients achieving each mRS score among the FPE and non-FPE groups**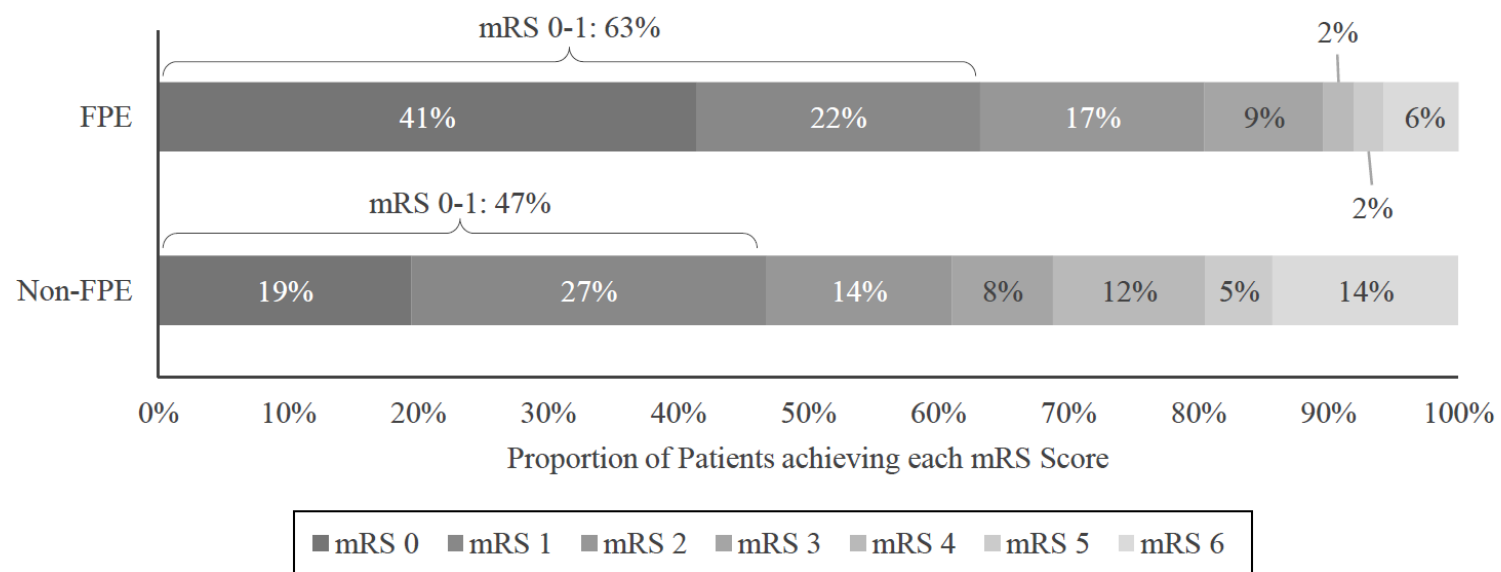

**Supplemental Figure III. Average per-patient procedural and hospitalization-related healthcare resource use costs for the FPE and non-FPE groups**

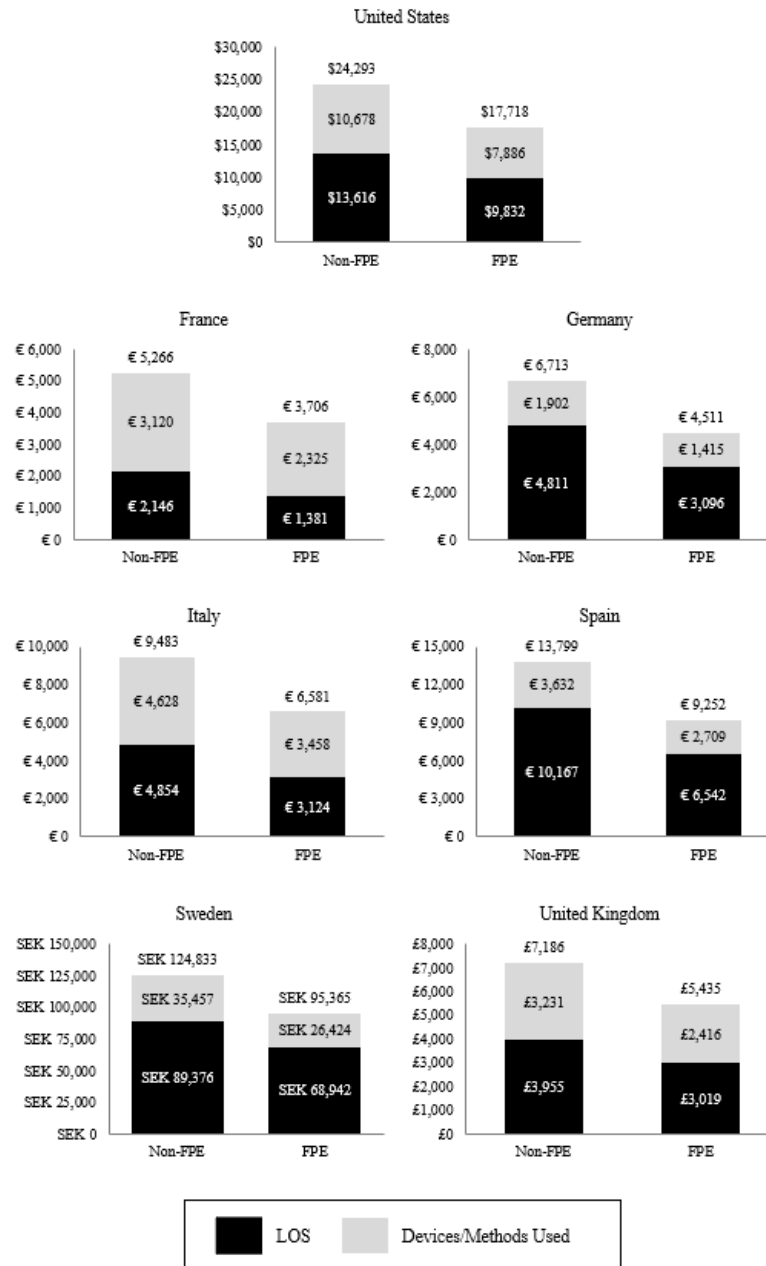

**Supplemental Figure IV. Average per-patient annual care costs, based on 90-day mRS, for the FPE and non-FPE groups**

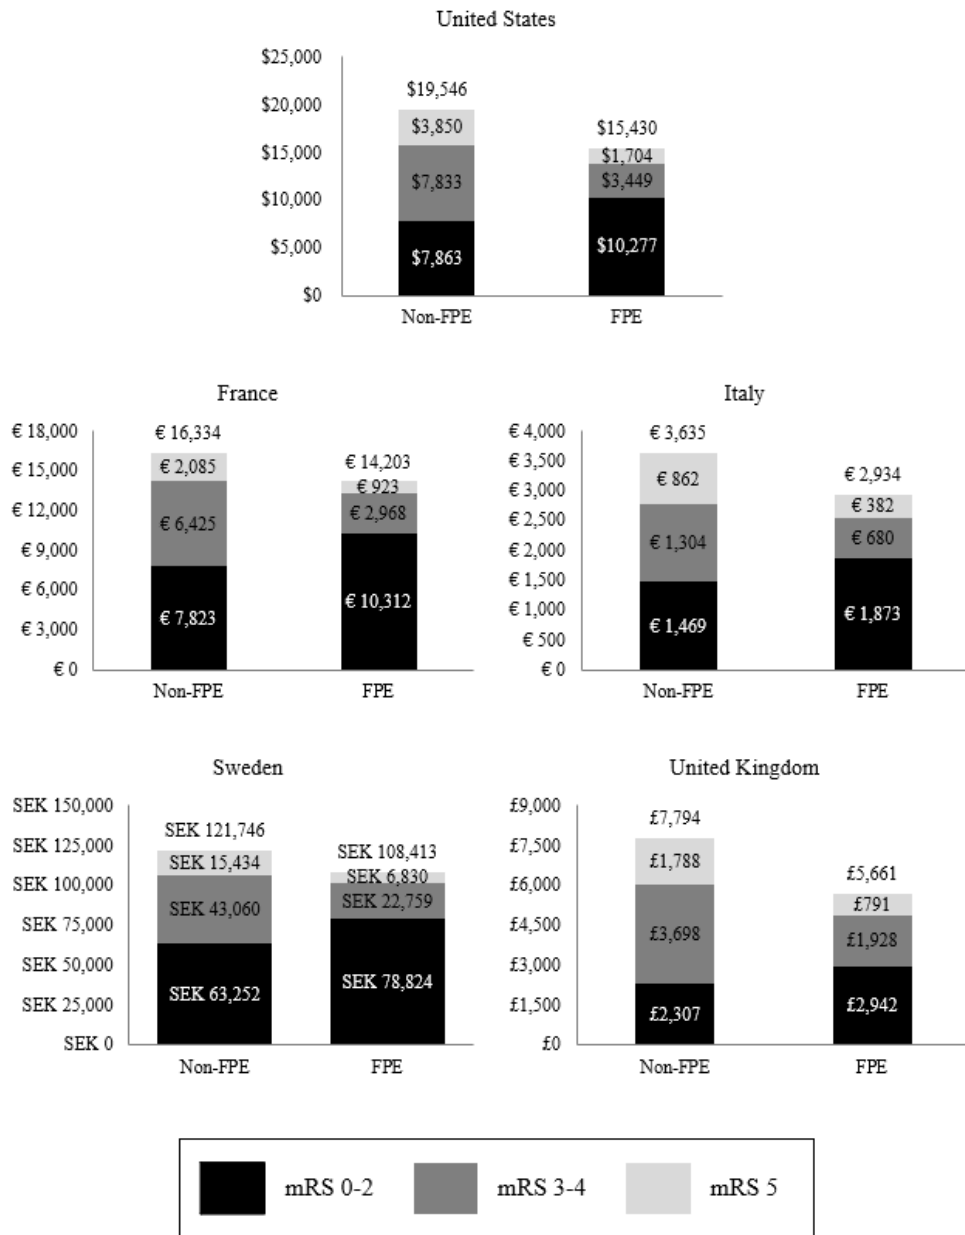

## References

1. Gershengorn HB, Garland A, Gong MN. Patterns of daily costs differ for medical and surgical intensive care unit patients. *Annals of the American Thoracic Society* 2015;12:1831-6.
2. Chen BP, Clymer JW, Turner AP, *et al.* Global hospital and operative costs associated with various ventral cavity procedures: a comprehensive literature review and analysis across regions. *Journal of medical economics* 2019;22:1210-20.
3. Dodel RC, Haacke C, Zamzow K, *et al.* Resource utilization and costs of stroke unit care in Germany. *Value in Health* 2004;7:144-52.
4. Fattore G, Torbica A, Susi A, *et al.* The social and economic burden of stroke survivors in Italy: a prospective, incidence-based, multi-centre cost of illness study. *BMC neurology* 2012;12:137.
5. Vega Valdés P, Murias Quintana E, Morales Santos E, *et al.* Análisis de los costes directos asociados a la trombectomía mecánica ya la fibrinólisis intravenosa en el Hospital Universitario Central de Asturias. *Revista de Neurología* 2018;66:7-14.
6. Steen Carlsson K, Andsberg G, Petersson J, *et al.* Long-term cost-effectiveness of thrombectomy for acute ischaemic stroke in real life: an analysis based on data from the Swedish Stroke Register (Riksstroke). *International Journal of Stroke* 2017;12:802-14.
7. Xu X-M, Vestesson E, Paley L, *et al.* The economic burden of stroke care in England, Wales and Northern Ireland: Using a national stroke register to estimate and report patient-level health economic outcomes in stroke. *European Stroke Journal* 2018;3:82-91.
8. Vidal GA, Milburn JM. The Penumbra 5MAX ACE catheter is safe, efficient, and cost saving as a primary mechanical thrombectomy device for large vessel occlusions in acute ischemic stroke. *Ochsner Journal* 2016;16:486-91.
9. Decision Resource Group (DRG). Clot Management Devices: Market Insights. 2018.
10. Shireman TI, Wang K, Saver JL, *et al.* Cost-Effectiveness of Solitaire Stent Retriever Thrombectomy for Acute Ischemic Stroke: Results From the SWIFT-PRIME Trial (Solitaire With the Intention for Thrombectomy as Primary Endovascular Treatment for Acute Ischemic Stroke). *Stroke* 2017;48:379-87.
11. Spieler J-F, Lanoë J-L, Amarenco P. Costs of stroke care according to handicap levels and stroke subtypes. *Cerebrovascular diseases* 2004;17:134-42.
12. Dental and Pharmaceutical Benefits Agency (TLV). Cost-effectiveness analysis of thrombectomy for treatment of acute severe ischemic stroke. 2015. Contract No.: 01009/2015.
13. Lobotesis K, Veltkamp R, Carpenter IH, *et al.* Cost-effectiveness of stent-retriever thrombectomy in combination with IV t-PA compared with IV t-PA alone for acute ischemic stroke in the UK. *Journal of medical economics* 2016;19:785-94.
14. Ruggeri M, Basile M, Zini A, *et al.* Cost-effectiveness analysis of mechanical thrombectomy with stent retriever in the treatment of acute ischemic stroke in Italy. *Journal of medical economics* 2018;21:902-11.
